# Supplementary material
Source: PubMed Central journal article supplement (PMC6511290)

| Allergen                | Unadjusted OR (95% CI) | Adjusted OR (95% CI)* |
|-------------------------|------------------------|-----------------------|
| ≥ 1 allergen            | 4.29 (2.30–7.98)       | 3.31 (1.42–7.73)      |
| Cat                     | 8.36 (4.30–16.24)      | 6.42 (2.99–13.79)     |
| <i>D. pteronyssinus</i> | 3.87 (2.22–6.72)       | 3.60 (1.81–7.17)      |
| <i>D. farinae</i>       | 3.93 (2.29–6.77)       | 3.84 (1.95–7.54)      |
| Dog                     | 5.79 (2.62–12.79)      | 3.04 (1.20–7.70)      |
| Mouse                   | 2.60 (1.04–6.50)       | 1.51 (0.54–4.22)      |
| Cockroach               | 1.75 (0.75–4.08)       | 1.15 (0.43–3.05)      |

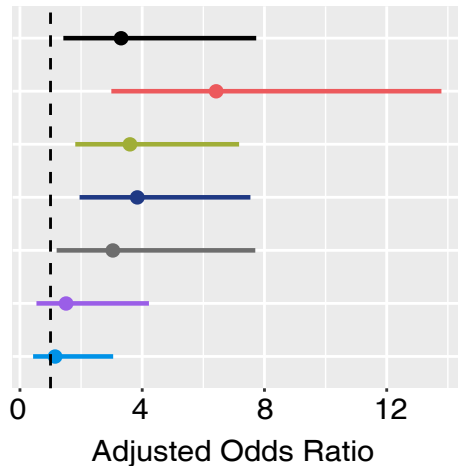

Supplement: NIHMS1518624-supplement-3.pdf [file NIHMS1518624-supplement-3.pdf]
