# Supplementary material
Source: PubMed Central journal article supplement (PMC6511290)

| Allergen                | Unadjusted OR (95% CI) | Adjusted OR (95% CI)* |
|-------------------------|------------------------|-----------------------|
| ≥ 1 allergen            | 3.81 (2.09–6.96)       | 2.83 (1.27–6.28)      |
| Cat                     | 7.10 (3.69–13.67)      | 5.02 (2.35–10.73)     |
| <i>D. pteronyssinus</i> | 5.01 (2.05–12.22)      | 6.10 (2.02–18.45)     |
| <i>D. farinae</i>       | 4.86 (2.09–11.31)      | 4.68 (1.71–12.79)     |
| Dog                     | 4.51 (2.38–8.55)       | 2.43 (1.13–5.22)      |
| Mouse                   | 5.75 (1.60–20.62)      | 2.94 (0.64–13.47)     |
| Cockroach               | 4.25 (1.36–13.22)      | 1.89 (0.50–7.14)      |

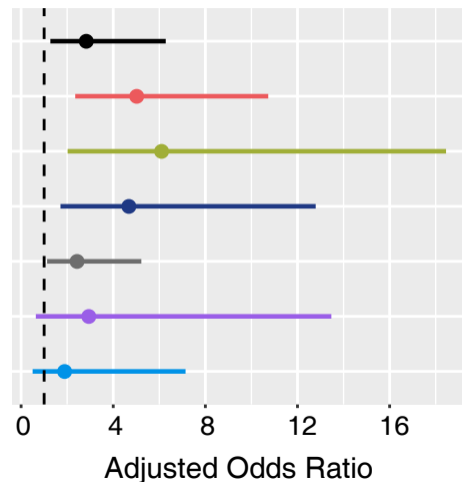

Supplement: NIHMS1518624-supplement-6.pdf [file NIHMS1518624-supplement-6.pdf]
