# Supplementary material
Source: PubMed Central journal article supplement (PMC6511290)

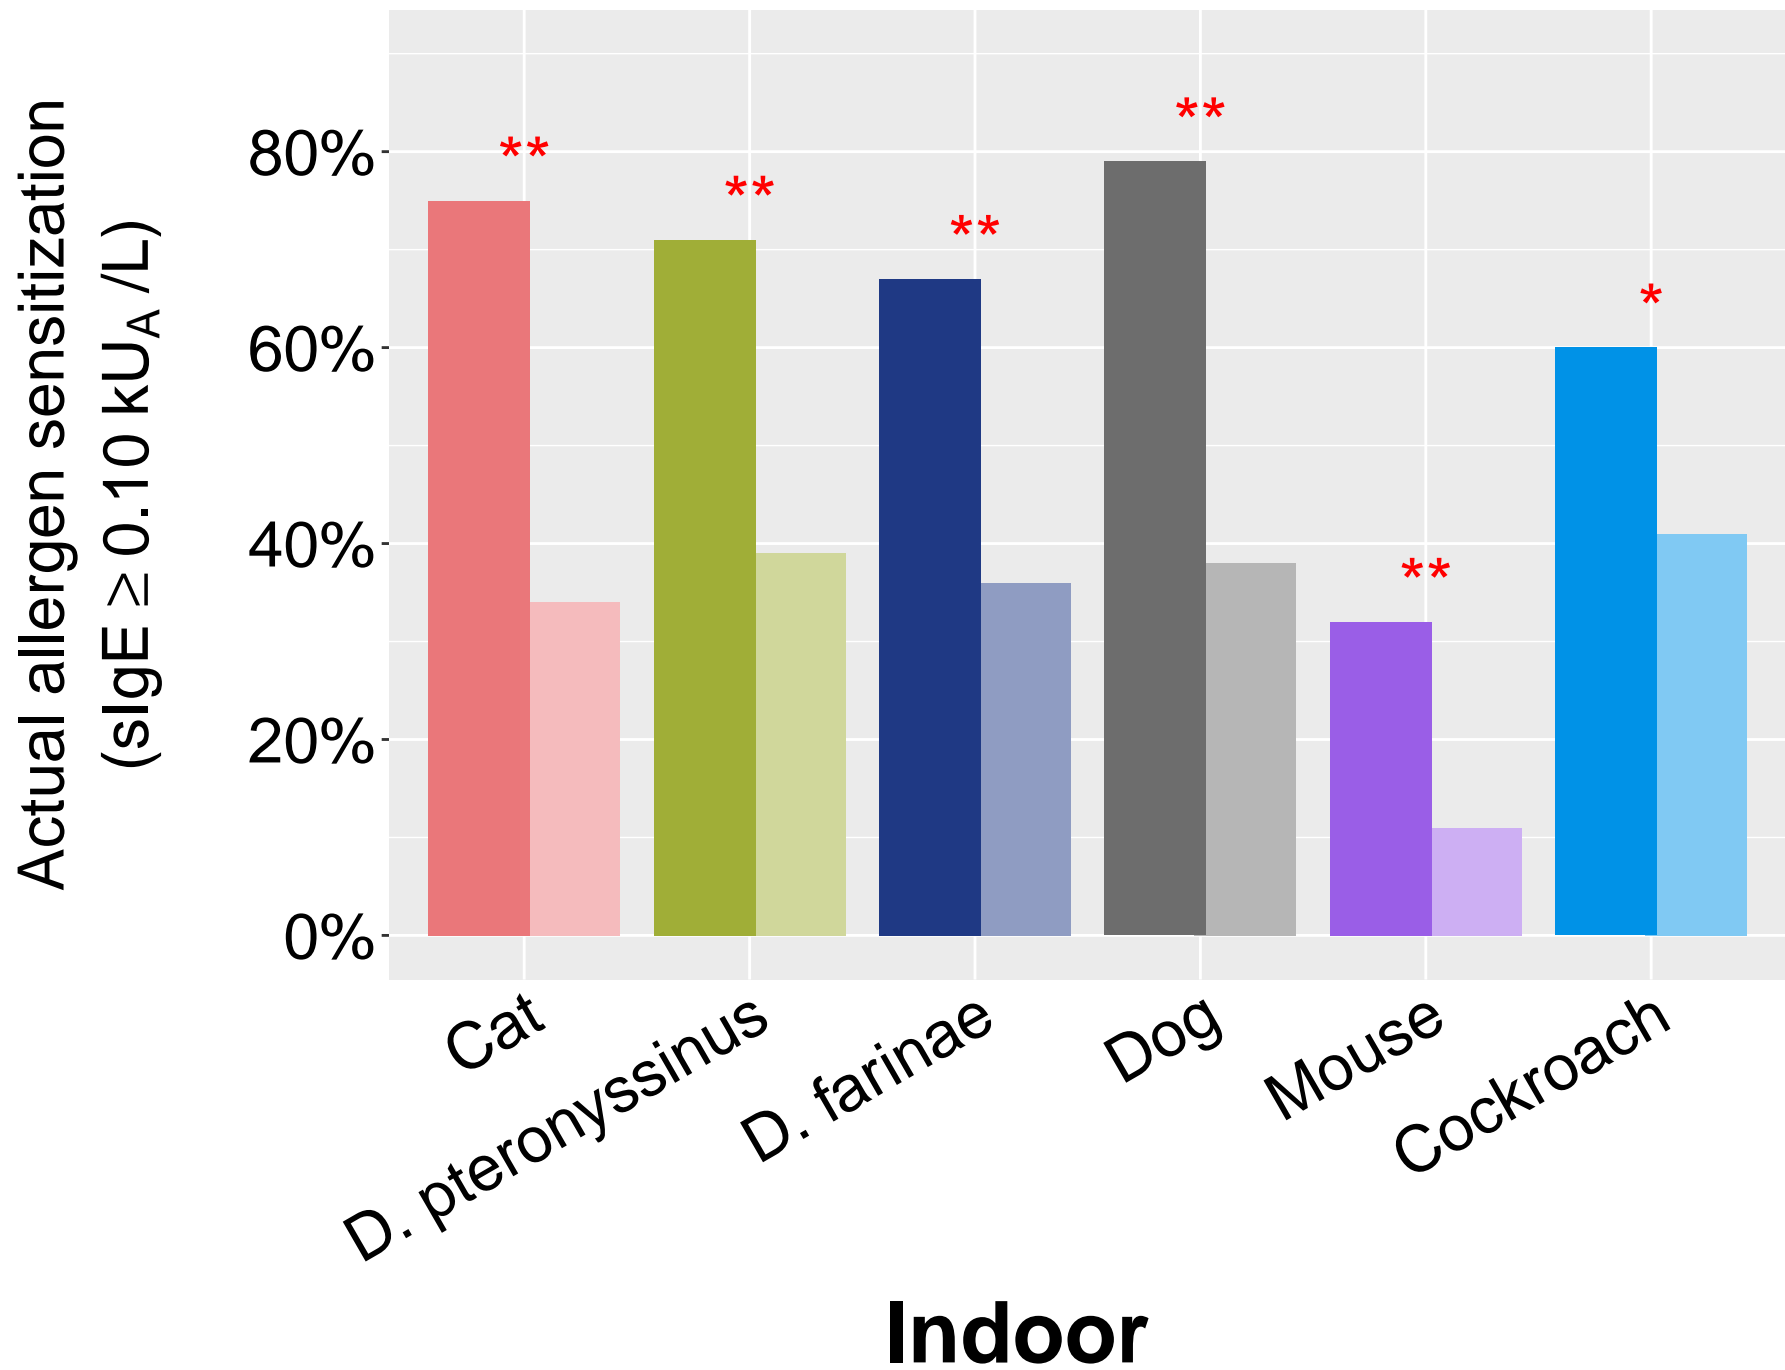

Supplement: NIHMS1518624-supplement-1.pdf [file NIHMS1518624-supplement-1.pdf]

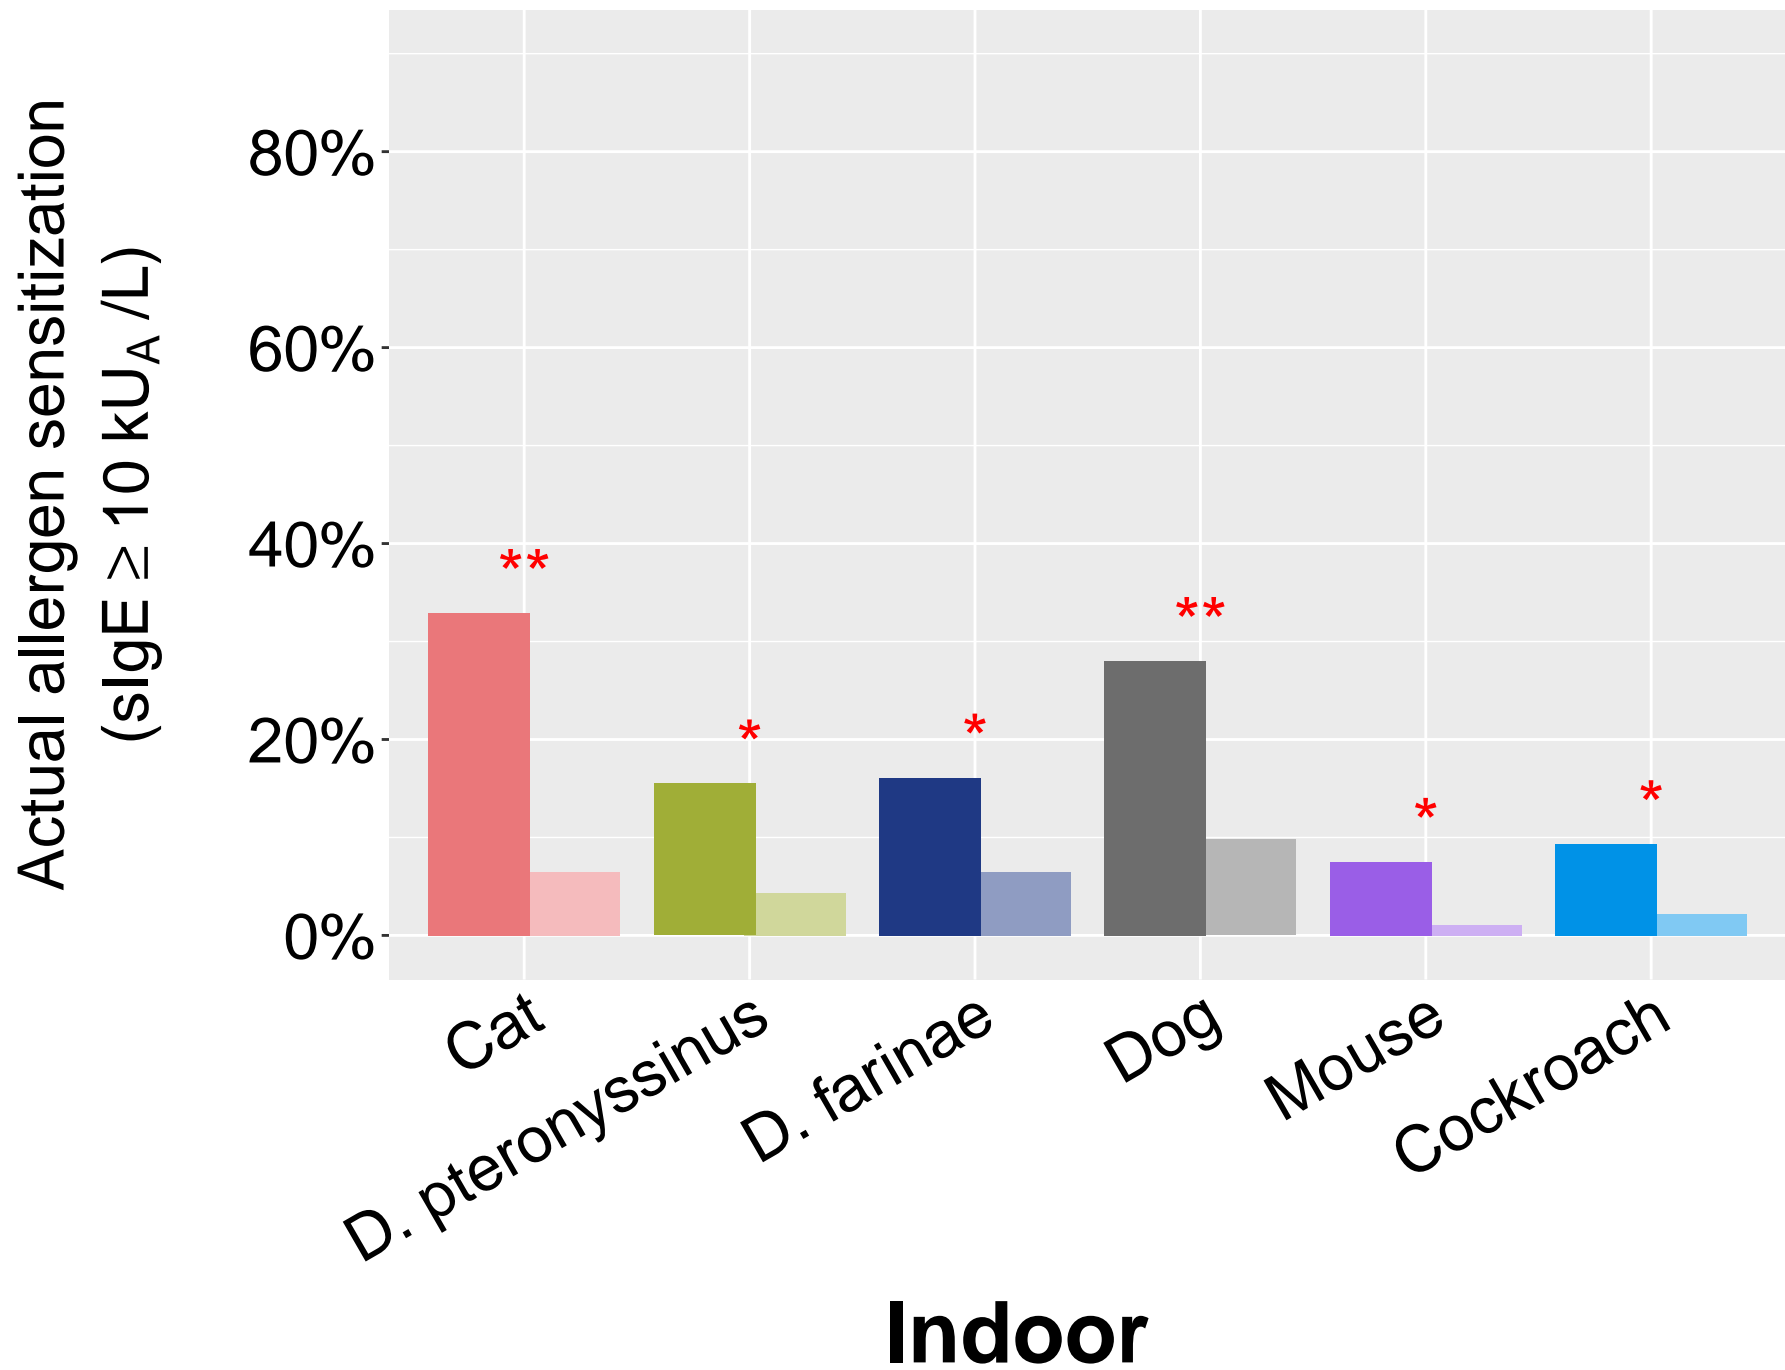

Supplement: NIHMS1518624-supplement-4.pdf [file NIHMS1518624-supplement-4.pdf]

**A**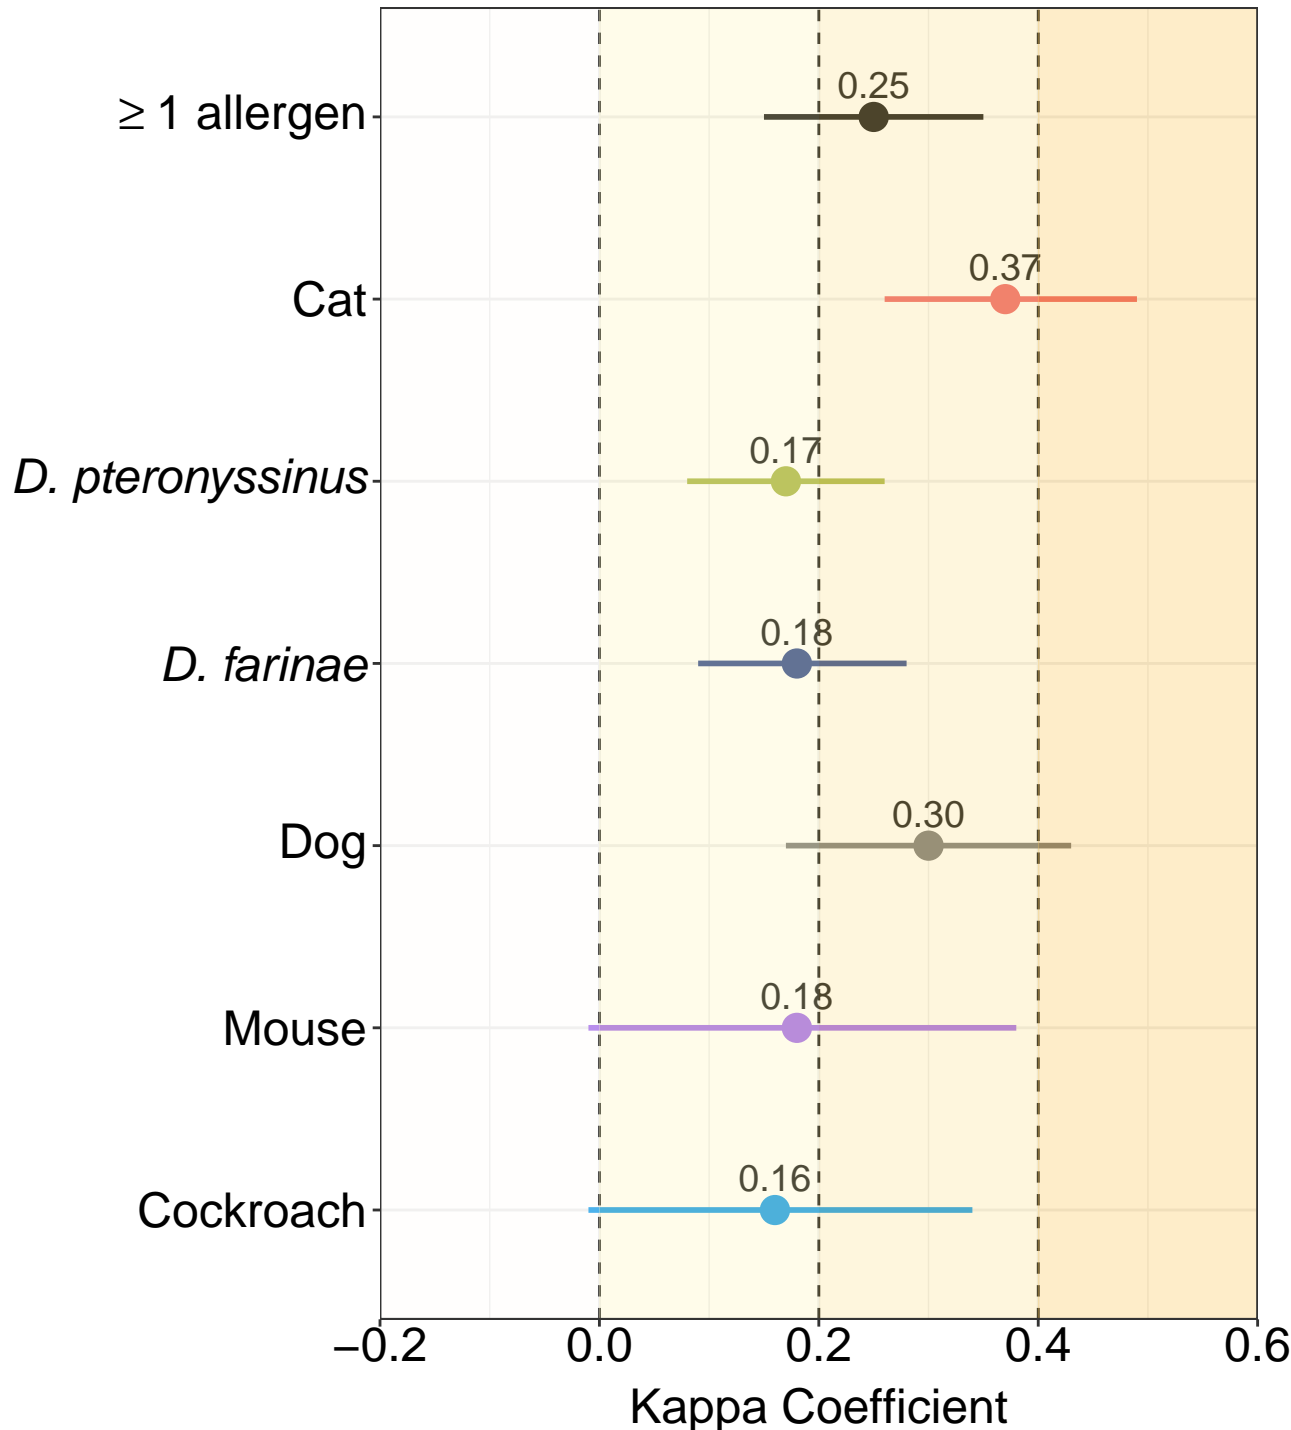**B**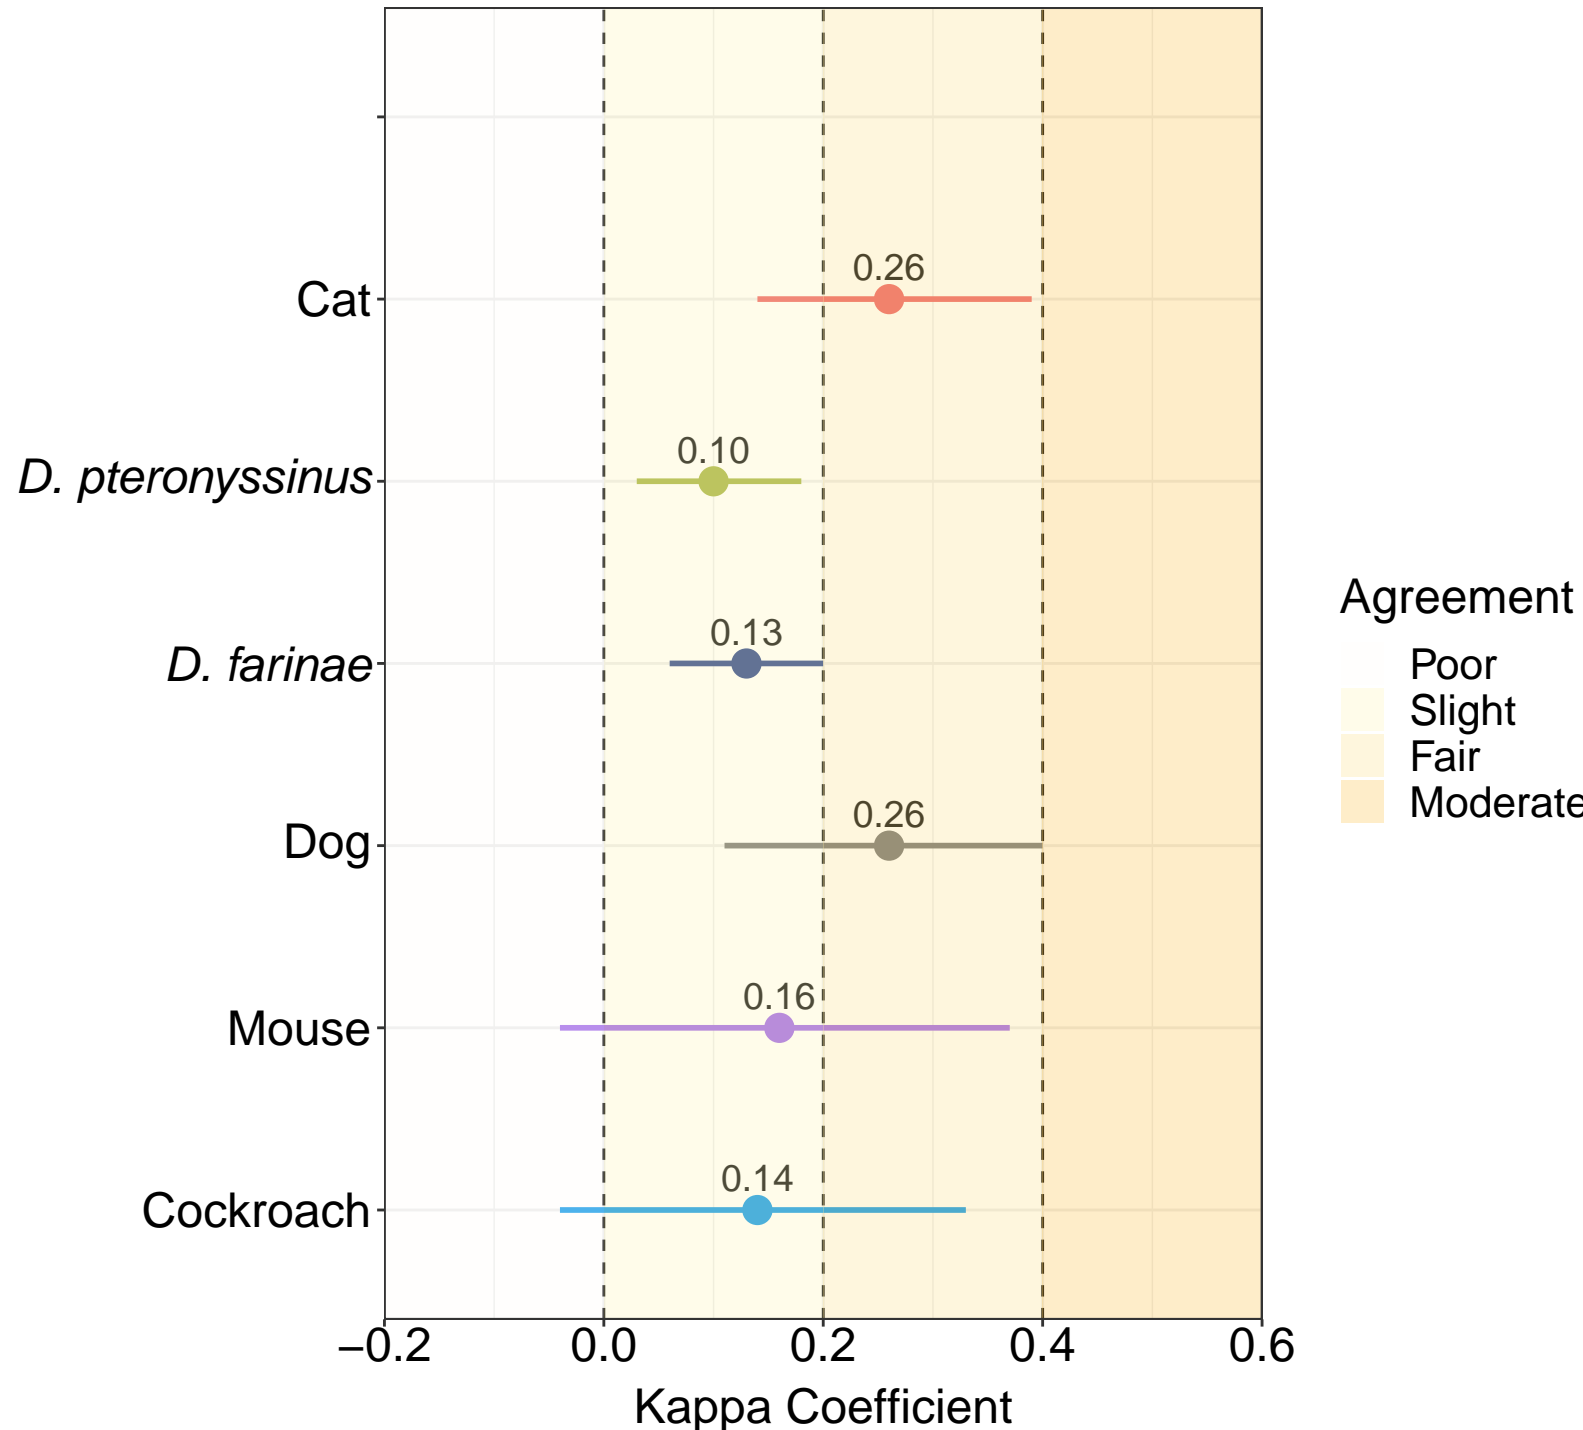

Supplement: NIHMS1518624-supplement-5.pdf [file NIHMS1518624-supplement-5.pdf]
